# Supplementary material
Source: PubMed Central journal article supplement (PMC2835249)
Supplement: mt2009103x3.pdf [file mt2009103x3.pdf]

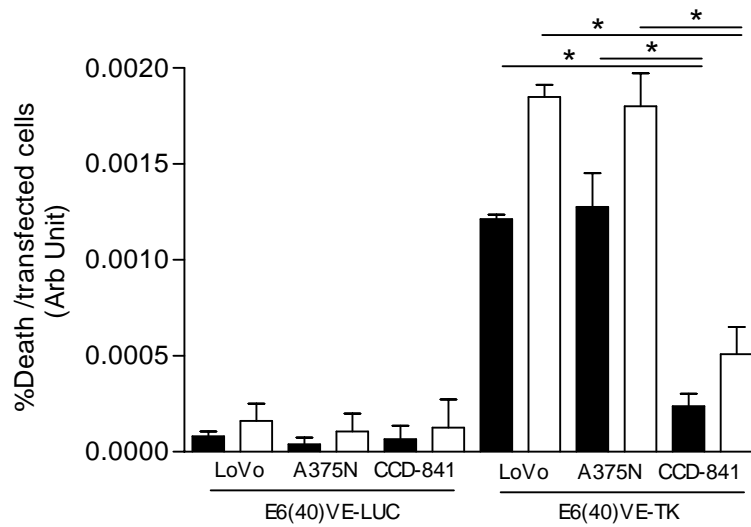

**Figure S3. E6(40)VE-TK activity in normal and malignant cells.** LoVo, A375N and CCD-841 cells were transiently co-transfected with E6(40)VE-TK and renilla plasmid and exposed to 10µM GCV (black columns) or 50µM GCV (white columns). Data was expressed as percentage of dead cells divided by the amount of transfected cells using renilla expression as a readout. (\* $P < 0.001$ ).
