# Supplementary material
Source: PubMed Central journal article supplement (PMC2835249)
Supplement: mt2009103x5.pdf [file mt2009103x5.pdf]

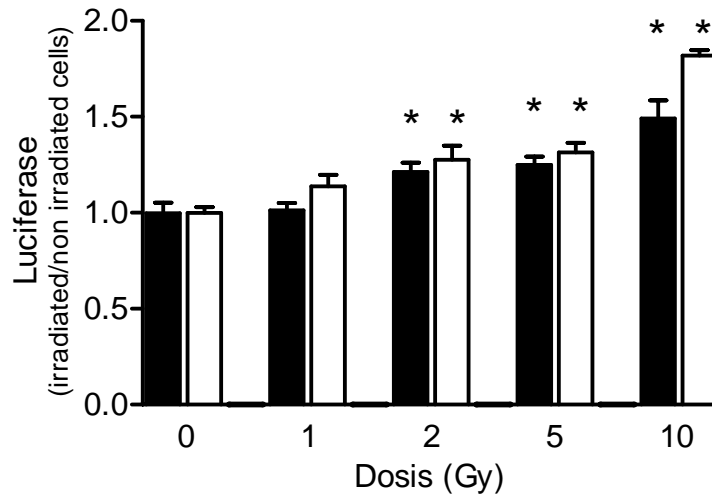

**Figure S5. Gamma irradiation response of the E6(40)VE promoter.** LoVo and A375N cells were transiently transfected with E6(40)VE-LUC and exposed to 1, 2, 5 and 10 Gy of gamma radiation. Luciferase activity was used as a readout and data are expressed as increased activity over non-irradiated control cells (\* $P < 0.01$ ).
