# Supplementary material
Source: PubMed Central journal article supplement (PMC2835249)
Supplement: mt2009103x6.pdf [file mt2009103x6.pdf]

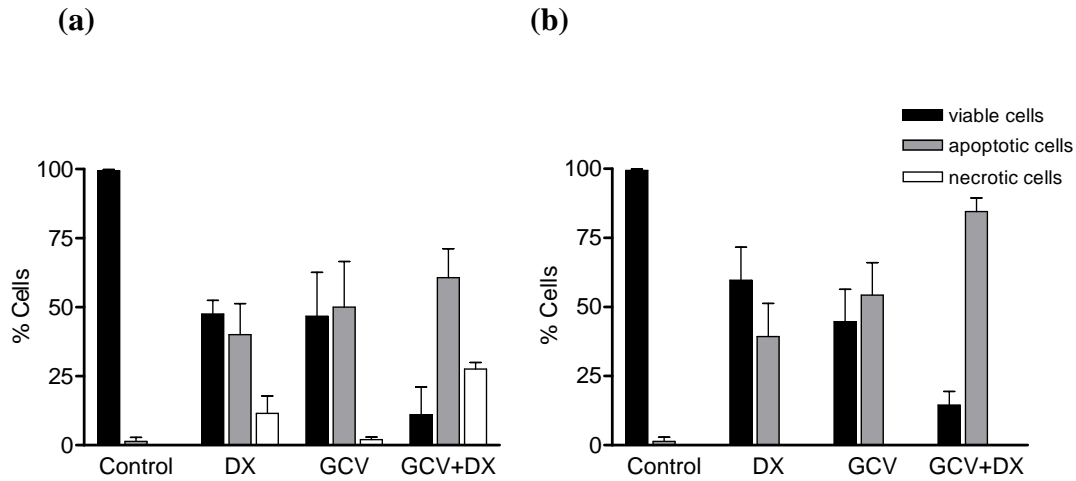

**Figure S6. Apoptosis was the main form of cell death induced by E6(40)VE-TK/GCV as single agent or in combination with DX.** Apoptosis and necrosis of LoVo and A375N cells were evaluated after transiently transfected with E6(40)VE-TK exposed to GCV alone or in combination with 0.5  $\mu$ M Dx.
