# Supplementary material
Source: PubMed Central journal article supplement (PMC2835249)
Supplement: mt2009103x7.pdf [file mt2009103x7.pdf]

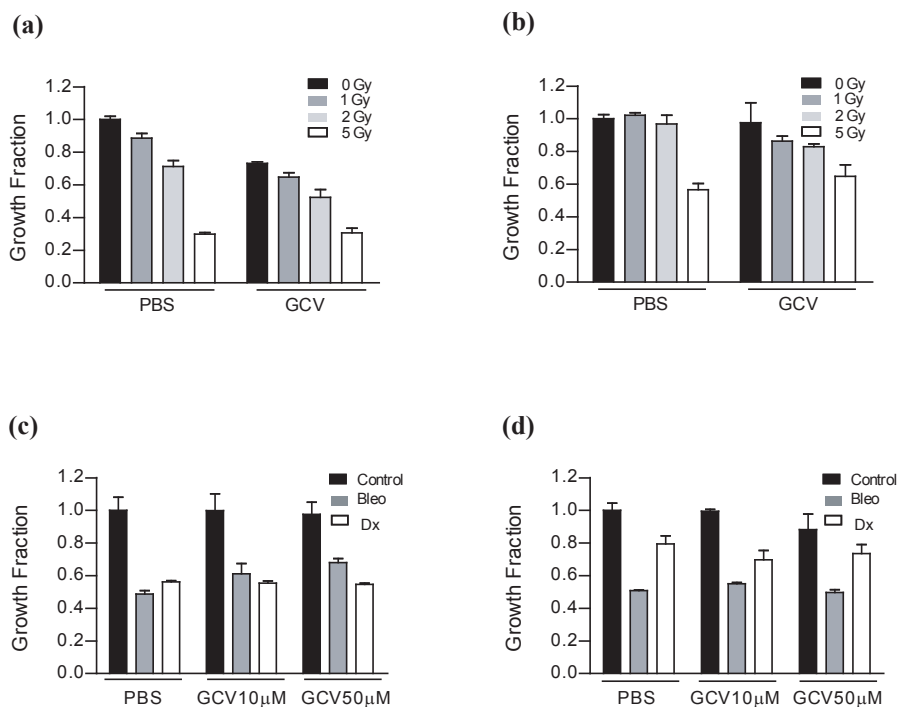

**Figure S7. Transfection of tumor cells with E6(40)VE-LUC, followed by GCV treatment, did not enhance the growth inhibition induced by  $\gamma$  irradiation, Bleo or Dx.** LoVo and A375N cells were transiently transfected with E6(40)VE-LUC and exposed to different levels of  $\gamma$  radiation (a and b), Dx, or Bleo (c and d), in the presence or absence of administration of 10 or 50  $\mu$ M GCV. "Growth fraction" indicates the percentage of surviving cells, compared to control cells.
