# Supplementary material
Source: PubMed Central journal article supplement (PMC2835249)

### Supplementary Figure S1

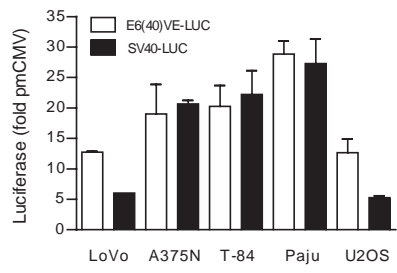

Supplement: mt2009103x1.pdf [file mt2009103x1.pdf]

Supplementary Figure S2

(a)

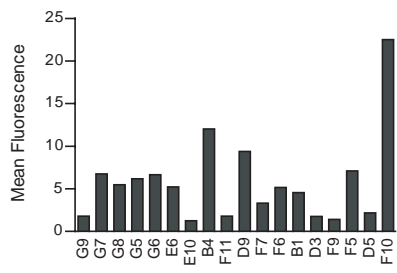

(b)

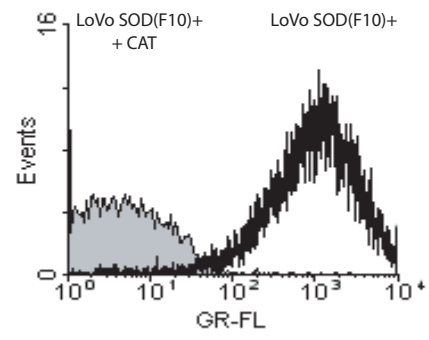

Supplement: mt2009103x2.pdf [file mt2009103x2.pdf]

Supplementary Figure S4

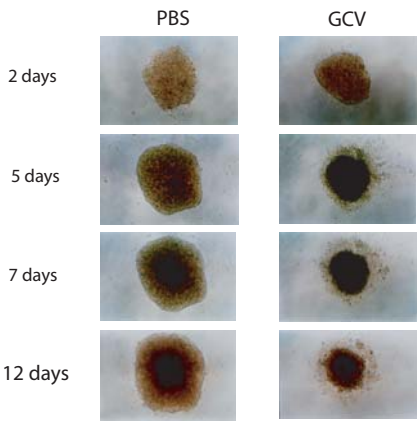

Supplement: mt2009103x4.pdf [file mt2009103x4.pdf]
